# Supplementary material
Source: Springer Nature journal article supplement (https://www.springermedizin.de/resource/supplementary/13058_2010_2871_MOESM13_ESM.pdf/9702780)

**A**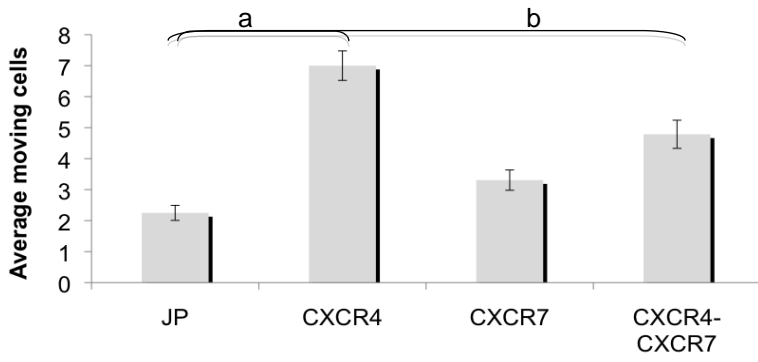**B**

MTLn3 JP primary tumor

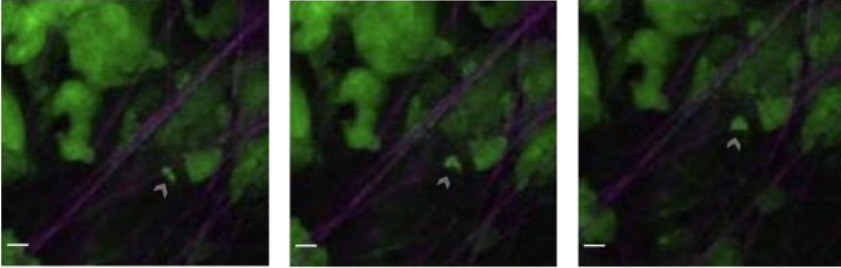

MTLn3 CXCR4 primary tumor

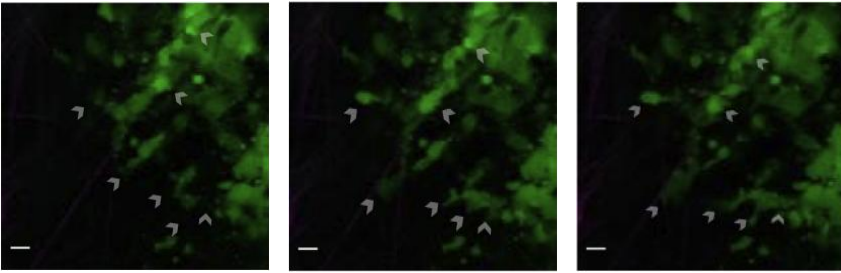

MTLn3 CXCR7 primary tumor

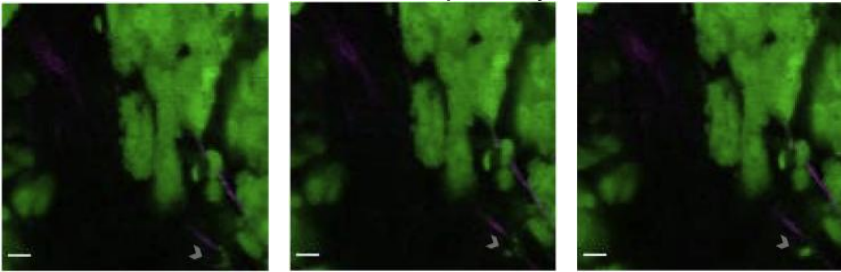

MTLn3 CXCR4-CXCR7 primary tumor

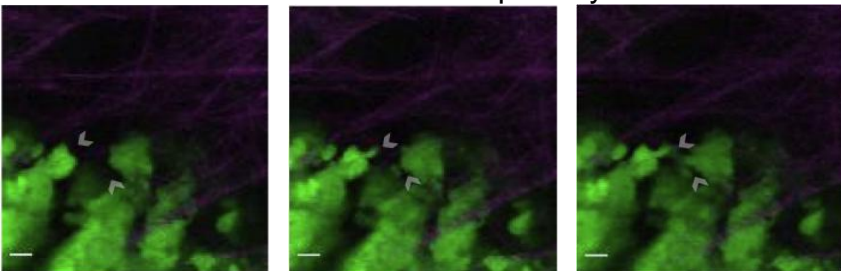

Supplement: MOESM13 [file 9702780]
